# Supplementary material for: Adolescent Overweight and Future Adult Coronary Heart Disease
Source: Atypon-hosted journal article supplement (doi:10.1056/nejmsa073166), 2007-12-05
Supplement: nejm_bibbins-domingo_2371sa1.pdf [file nejm_bibbins-domingo_2371sa1.pdf]

## Supplementary Appendix

This appendix has been provided by the authors to give readers additional information about their work.

Supplement to: Bibbins-Domingo K, Coxson P, Pletcher M, et al. Effect of adolescent overweight on future adult coronary heart disease. *N Engl J Med* 2007;357:2371-9.

## **Supplementary Appendix to the Manuscript - “Adolescent Overweight and Adult Coronary Disease” Bibbins-Domingo, et al.**

### **The CHD Policy Model**

The CHD Policy Model is a state transition model of the US population with respect to risk factors for coronary heart disease. In the version of the Model used for this analysis, the U.S. population age 35 to 85 years, without a history of CHD, was apportioned into 4860 risk cells defined by six modifiable risk factors: diastolic blood pressure (DBP) (<85, 85-90, >90 mmHg), low density lipoprotein (LDL) cholesterol (<100, 100-130, >130 mg/dL), high density lipoprotein (HDL) cholesterol (<35, 35-49, >49), smoking status (active smoker, non-smoker with exposure to environmental tobacco smoke, non-smoker without environmental exposure), body mass index (BMI) (<25, 25-29, >29 kg/m<sup>2</sup>), and diabetes mellitus (yes or no), as well as by sex and ten-year age range. The population with prevalent CHD was apportioned into 1600 cells according to their age, sex, history of myocardial infarction (MI), arrest, angina, and/or revascularization.

CHD incidence and non-CHD deaths in the population without prior CHD were determined by logistic risk functions based on the Framingham longitudinal data. Transitions in the disease history component of the model were based on age-range specific event and case fatality rates estimated from national data, and literature-based relative risks of events among disease history subgroups (e.g., prior MI versus none). Non-CHD death rates in the population with CHD reflected the relative risk of non-CHD death for this population in the Framingham data. In the absence of evidence of a trend, all of these rates were assumed to remain constant. Absolute

numbers of events vary with temporal changes in the population, the age-range distribution of the population, and in response to user-defined interventions.

All population distributions, risk factor levels, coefficients, event rates, case fatality rates, costs, and quality of life adjustments can be modified for forecasting simulations.

**Population estimates**

Population estimates for the adult US population over age 35 and older in 2000 were obtained from the US Census 2000 data by age and sex. Estimates (2000-2007) and projections (2008-2050) of the 35 year-old population were also obtained from the US Census 2000. US Census projections for 2020 to 2035 are used in this current study.

**Projections of 35 year olds 2020-2035<sup>1</sup>**

| Year | Female    | Male      | Year | Female    | Male      |
|------|-----------|-----------|------|-----------|-----------|
| 2020 | 2,196,917 | 2,246,555 | 2028 | 2,301,673 | 2,349,662 |
| 2021 | 2,215,467 | 2,261,830 | 2029 | 2,268,652 | 2,314,389 |
| 2022 | 2,220,027 | 2,261,702 | 2030 | 2,252,525 | 2,298,749 |
| 2023 | 2,256,508 | 2,301,103 | 2031 | 2,237,545 | 2,280,146 |
| 2024 | 2,296,826 | 2,345,731 | 2032 | 2,210,157 | 2,246,511 |
| 2025 | 2,361,429 | 2,414,512 | 2033 | 2,207,077 | 2,244,761 |
| 2026 | 2,358,808 | 2,407,717 | 2034 | 2,226,843 | 2,263,553 |
| 2027 | 2,329,522 | 2,373,958 | 2035 | 2,257,059 | 2,296,113 |

## **CHD Prevalence**

The background prevalence of CHD in 2000 was estimated from the National Health Interview Survey. The background prevalence of prior revascularization procedures was estimated from revascularizations before 2000 and estimated survival after revascularization.

## **CHD Deaths**

Data on CHD deaths were obtained from the 2000 Vital Statistics Mortality Data.<sup>2</sup> CHD deaths were estimated using the International Classification of Diseases (ICD) 10 codes I20-I25, I46 and 2/3 of I49, I50, and I51.<sup>3,4</sup> Other deaths were considered to be non-CHD deaths.

## **Arrest (sudden death) with resuscitation**

The number who survive arrest to hospital discharge was estimated from National Hospital Discharge Survey (NHDS) for 1990-1999. Because the numbers are very small in any given year, we averaged the national estimates over the ten-year period.

Estimates of pre-hospital arrest fatalities were based on Vital Statistics mortality data for selected causes by place of death.<sup>3,5</sup> For ICD10 codes I20-I25, all emergency room deaths and those dead on arrival were assumed to be deaths from arrests. All nursing home deaths were considered to be chronic CHD deaths. In-residence and "other place" deaths were estimated to have had resuscitation attempted based on reported resuscitation rates for witnessed<sup>6</sup> or unwitnessed<sup>7</sup> arrest.

### **Proportion of arrests with no history of CHD**

The CHD history of arrest patients is harder to ascertain than for MI because there is no national registry, because the numbers are smaller, and because fewer studies are available. We estimated the age range specific proportions of arrest with and without a history of CHD by a least squares fit to data from multiple sources.<sup>8,9</sup>

### **Myocardial Infarction (MI)**

Myocardial infarction (MI) target values were estimated from discharges coded as 410 in the NHDS 2000 data set. Records for MI with a hospital stay of less than 3 days and no acute revascularization in the same hospitalization were eliminated as likely “rule-out MI” cases. Remaining counts were reduced by the double count fraction reported by Westfall<sup>10</sup>, and an additional 3% deduction was applied for miscoding, as reported by Petersen.<sup>11</sup>

### **MI case fatality rates**

We used the NHDS 1996-2000 mean MI fatalities per adjusted total MI by age range for the older age-ranges (65-84years) and the National Registry of Myocardial Infarction (NRMI) in-hospital case fatality rates for the younger age ranges (35-44 years).<sup>12</sup> Studies of young MI patients estimate in-hospital mortality at 1-6% compared with 8-22% in older patients.<sup>13</sup>

We estimated in-hospital and 30-day case fatality rates from hospital discharge records from the State of California Office of Statewide Health Planning and Development (OSHPD) for the year 2000.<sup>14</sup> The in-hospital case-fatality rate was based on unique person records (duplicate entries eliminated by matching social security numbers (SSN)). A small number of records do not have

SSNs and were omitted from the analysis. The overall 30-day in-hospital case fatality rate ratio was 1.28953 (12.07/9.36). This ratio was used to adjust our in-hospital case fatality rate to 30-day mortality.

Based on Rieves et al.<sup>15</sup>, we incorporated a mortality odds ratio of 1.6 for MI patients with prior MI and of 1.17 for patients with prior angina. Subset case fatality rates were calculated to reflect these odds ratios and preserve the overall estimated case fatality rate for MI.

### **Revascularization Rates**

The number of percutaneous coronary intervention (PCI) and coronary artery bypass grafting (CABG) procedures was estimated from the NHDS for 2000. The revascularization rate was adjusted to reflect a repeat revascularization rate for PCI and for CABG within the first year. A trend in the ratio of PCI to CABG was estimated for 2000-2004. We assumed that PCI would be included as part of the treatment for MI in the same proportion observed in the NHDS data set for 2000, with emergency CABG complicating 2% of these procedures. We included reductions in mortality and re-MI rates for patients treated with PCI.<sup>16, 17</sup>

### **The Risk Functions for Incident CHD and non-CHD Death**

Incident CHD cases (MI, arrest, or angina) and non-CHD deaths in each risk factor cell for the at-risk US population were determined by risk functions  $r$  incorporating age/sex specific parameters  $\alpha$  and risk factor specific betas  $\{\beta_k, k = 1, 2, 3, \dots, 6\}$ , which are constant over the time span of a simulation, and cell specific risk factor means  $\{m_k, k = 1, 2, 3, \dots, 6\}$ , which are altered by user-defined intervention:

$$r = e^{(\alpha + \sum_{k=1}^6 \beta_k m_k)} / (1 + e^{(\alpha + \sum_{k=1}^6 \beta_k m_k)})$$

Beta coefficients for CHD risk were determined for a 60-year-old, the average age of the first onset of CHD in individuals in examinations 9 to 13, 24, and 25 from the original Framingham cohort and 1-6 from the Framingham offspring cohort, for whom adequate data were available for a time-dependent logistic regression analysis.<sup>18</sup> For LDL cholesterol, the slope of the beta coefficient with age was determined from the interaction between LDL cholesterol and age, after adjusting for age and LDL cholesterol. For the other risk factors, the sex-specific slopes with age were calculated from the weighted average of the White/African American slopes in a large pooled analysis<sup>19</sup> of multiple epidemiologic studies that reported beta coefficients for these risk factors, but not for LDL cholesterol. For diastolic blood pressure, the slope was adjusted for the age and sex-specific average ratio of diastolic to systolic blood pressure. The resulting coefficients were generally similar to those reported in various epidemiologic studies, and the coefficient for LDL cholesterol closely matched the calculated age-specific beta coefficient after the first year of statin treatment in a large meta-analysis of statin trials.<sup>20</sup>

Beta coefficients for non-CHD death were determined from the same exam sets of the Framingham cohort and offspring data used for the CHD betas, but with DBP, smoking, and diabetes as the only statistically significant covariates in the logistic regression analysis.

We estimated overall incidence of CHD and non-CHD death by age-range and sex for 2000 by adjusting the Framingham incidence estimates for 1986 to take into account the trends in risk factor means from 1986 to 2000. The corresponding values of the intercepts were estimated by

iterative fitting of the risk function to the overall incidence. The MI and arrest components of incidence were constrained to match estimates from Olmsted County.<sup>21</sup>

The CHD and non-CHD death risk functions are applied to every state in every year of a simulation, so that the competing risk of these two outcomes is accommodated naturally over time.

### **Incident CHD Event Allocation**

Risk factors were assumed to affect the incidence of myocardial infarction, arrest, and angina in proportion to overall incidence, except smoking was assumed to have a higher relative risk for infarction and arrest<sup>22</sup> and a proportionately lower coefficient for angina. Environmental tobacco exposure was assumed to carry a relative risk of 1.26 for myocardial infarction and cardiac arrest compared with non-exposed non-smokers<sup>23</sup> but not to influence angina.

### **Transitions Between Risk Factor Levels**

Transfers from one risk factor level to another were included to preserve the National Health and Nutrition Evaluation Survey (NHANES) proportions of the population with each risk factor level. For example, the proportion of 35-44 year old men with low (<100 mg/dL) LDL cholesterol is 0.215. For 45-54 year old men the proportion is 0.133. The shift toward higher LDL cholesterol levels is most likely caused by increasing LDL levels as people age. In higher age ranges, this trend reverses, so that by age 75-84, the proportion is 0.314. The change in the upper age ranges is most likely due to a more complex array of factors, including the fact that people with higher risk are more likely to die. Annual transfer rates between risk factor levels

were calculated to reduce the low risk population from 0.215 to 0.133 over 10 years, without regard to the reason for the change, but taking into account the effect of the Model's CHD incidence and non-CHD death rates.

### **Projection of the increased proportion of US 35 year-olds with BMI $\geq 30$ kg/m<sup>2</sup>**

Overweight adolescents are likely to become obese adults.<sup>24</sup> We used NHANES I ('71-'74), NHANES II ('76-'80), NHANES III ('88-'94), and NHANES '99-'00<sup>25</sup> to determine the relationship between the proportion of overweight adolescents (age 12-19) and the proportion of obese 35 year-olds 20 years later. We did not find evidence for accelerated growth of the obese fraction as the adolescent overweight fraction increased, so we conservatively assumed that the obese fraction would grow at the same annual rate, adding to the adolescent starting point. Two paired NHANES data sets were used to estimate a low rate  $r_L$  and a high rate  $r_H$ , so that the obese fraction  $y$  in 2020 was estimated as a function of the adolescent obese fraction  $x$  in 2000:

$$y_L = x + 20r_L$$

$$y_H = x + 20r_H$$

The average of these two projections was used for our middle series of simulations. We implemented the change of prevalence as a shift in the distribution of NHANES '99-'02 BMI, with the magnitude of the shift equal to the projected increase in mean BMI.

|                                                            | Proportion overweight adolescents | Proportion obese 35 year-olds | Average annual increase in obese proportion | Projection |
|------------------------------------------------------------|-----------------------------------|-------------------------------|---------------------------------------------|------------|
| Cohort 1<br>(adolescents - NHANES I; adults NHANES III)    | Male = 6.1<br>Female = 6.2        | Male =17.0<br>Female= 25.8    | Male =0.6<br>Female = 1.0                   | “Low”      |
| Cohort 2<br>(adolescents NHANES II; adults NHANES '99-'00) | Male = 4.8<br>Female = 5.3        | Male 26.0<br>Female = 32.5    | Male = 1.0<br>Female = 1.4                  | “High”     |
|                                                            |                                   |                               | Male = 0.8<br>Female = 1.2                  | “Average”  |

### **Linking increases in BMI to changes in DBP, LDL cholesterol, HDL cholesterol, and diabetes**

We assumed that increases in BMI are associated with adverse levels of other CHD risk factors (diastolic blood pressure, LDL cholesterol, HDL cholesterol, diabetes). In our simulations, the distribution of each of these associated risk factors was assigned a shift in mean that reflected the observed relationship to BMI.<sup>22, 23, 26, 27</sup> Risk proportions for BMI, LDL cholesterol, HDL cholesterol, diastolic blood pressure (DBP), and diabetes were shifted for incoming 35 year olds, reflecting a higher proportion of the population in the higher risk categories. Except in the case of diabetes, we did not modify the annual transition rates either up (to reflect an accelerated trend toward higher risk) or down (to reflect a tendency for the increased risk to dissipate with time). The transition to diabetes from the non-diabetic population was increased to reflect the lagged effect of obesity on incidence of diabetes.

Risk Factor LINKS WITH CONFIDENCE INTERVALS

| Change due to 1.0 Shift in BMI w Confidence Intervals |        |         |         | Change due to 1.0 Shift in BMI w Confidence Intervals |        |        |        |
|-------------------------------------------------------|--------|---------|---------|-------------------------------------------------------|--------|--------|--------|
| MEN                                                   | Mean   | Lower   | Higher  | WOMEN                                                 | Mean   | Lower  | Higher |
| DBP                                                   | 0.9    | 0.76    | 1.04    | DBP                                                   | 0.74   | 0.63   | 0.84   |
| LDL                                                   | 2.75   | 1.44    | 3.67    | LDL                                                   | 2.24   | 0.54   | 3.36   |
| HDL                                                   | -1.55  | -1.93   | -1.16   | HDL                                                   | -0.77  | -1.16  | -0.39  |
| BMI MEAN SHIFT:                                       |        |         | 1.3     | BMI MEAN SHIFT:                                       |        |        | 1.3    |
| MEN                                                   | Mean   | Lower   | Higher  | WOMEN                                                 | Mean   | Lower  | Higher |
| DBP                                                   | 1.17   | 0.988   | 1.352   | DBP                                                   | 0.962  | 0.819  | 1.092  |
| LDL                                                   | 3.575  | 1.872   | 4.771   | LDL                                                   | 2.912  | 0.702  | 4.368  |
| HDL                                                   | -2.015 | -2.509  | -1.508  | HDL                                                   | -1.001 | -1.508 | -0.507 |
| BMI HIGH SHIFT:                                       |        |         | 1.7     | BMI MEAN SHIFT                                        |        |        | 2.5    |
| MEN                                                   | Mean   | Lower   | Higher  | WOMEN                                                 | Mean   | Lower  | Higher |
| DBP                                                   | 1.53   | 1.292   | 1.768   | DBP                                                   | 1.85   | 1.575  | 2.1    |
| LDL                                                   | 4.675  | 2.448   | 6.239   | LDL                                                   | 5.6    | 1.35   | 8.4    |
| HDL                                                   | -2.635 | -3.281  | -1.972  | HDL                                                   | -1.925 | -2.9   | -0.975 |
| BMI LOW SHIFT:                                        |        |         | 0.72    | BMI MEAN SHIFT:                                       |        |        | 0.4    |
| MEN                                                   | Mean   | Lower   | Higher  | WOMEN                                                 | Mean   | Lower  | Higher |
| DBP                                                   | 0.648  | 0.5472  | 0.7488  | DBP                                                   | 0.296  | 0.252  | 0.336  |
| LDL                                                   | 1.98   | 1.0368  | 2.6424  | LDL                                                   | 0.896  | 0.216  | 1.344  |
| HDL                                                   | -1.116 | -1.3896 | -0.8352 | HDL                                                   | -0.308 | -0.464 | -0.156 |

Our assumption that the impact of obesity on events and deaths is mediated by changes in blood pressure, lipid levels, and diabetes is consistent with recent data showing that obesity increases deaths due to CHD, non-CHD cardiovascular disease, diabetes, and kidney disease, but that obesity is associated with only a small and non-significant increase in cancer deaths and is not associated with higher rates of death from other causes.<sup>28</sup>

**Modeling risk factor treatment scenarios**

Reversing the effect of BMI increases on DBP, LDL cholesterol, and HDL cholesterol was modeled by reverting to the baseline distributions for those risk factors.

### **Sensitivity of Simulation Results to Variation in Model Parameters**

Monte Carlo simulations were used to determine the uncertainty around outcomes. Beta coefficients for the association of diastolic blood pressure, LDL and HDL cholesterol, and diabetes with both CHD and non-CHD events were assumed to have a normal probability distribution with standard errors derived from the fitted regression. We generated covariance matrices for each of these beta coefficients; based on the evidence for minimal correlation between these factors, we assumed these effects to be independent. For each simulation we report the mean and standard error of the mean (SEM) for 1000 simulations.

Because our Model's current categorization of BMI is BMI < 25, 25-29, and > 29 rather than BMI <25, 25-30, and  $\geq 30$ , we also looked at whether the grouping of the population within cells could affect our results, independent of all other assumptions, which used BMI  $\geq 30$  throughout our analysis. Differences in the excess events in the two sets of simulations were on the order of 1% to 4%, which is substantially less than the variation due to beta uncertainty in the Monte Carlo simulation and too small to alter any conclusions.

### **Quality Control and Validation**

The CHD Policy Model was calibrated to reproduce national data on risk factor distributions, total CHD deaths, acute MI, witnessed sudden cardiac death, and revascularization procedures in the base year. Relative risks for event and case fatality rates in subgroup populations were estimated from the literature and were applied to the appropriate group, adjusting the rate in its complementary subgroup to preserve the overall national rates. All risks and rates were assumed to be constant over time, in the absence of evidence of a trend. Trends, for example in the

utilization of revascularization between 2000 and the present, were incorporated as they become apparent, but were not projected into the future.

Validation of projections into the future is an ongoing effort in which the Model's results under a broad range of scenarios were compared with data from studies, clinical trials, and surveys, obtained from public sources or by personal communication. Validation required reasonable agreement in outcomes when the conditions that produced the data were incorporated.

For example, simulations of the US population aged 45-64, imposing the pre- and post- LDL cholesterol and HDL cholesterol levels recorded in the West of Scotland Study (WOSCOPS), resulted in similar results for the cumulative percentage of the cohort to have died of CHD or have had a first MI.

**Cumulative percentage of first CHD events (MI or CHD death)**

| Year                                                      | WOSCOPS* |        |       | CHD Policy Model |        |       |
|-----------------------------------------------------------|----------|--------|-------|------------------|--------|-------|
|                                                           | Placebo  | Interv | Ratio | Baseline         | Interv | Ratio |
| 1                                                         | 1.7%     | 1.2%   | 0.73  | 1.6%             | 1.1%   | 0.67  |
| 2                                                         | 3.2%     | 2.2%   | 0.68  | 3.3%             | 2.2%   | 0.67  |
| 3                                                         | 4.9%     | 3.3%   | 0.68  | 5.1%             | 3.4%   | 0.67  |
| 4                                                         | 6.5%     | 4.3%   | 0.67  | 7.0%             | 4.6%   | 0.66  |
| 5                                                         | 9.2%     | 6.4%   | 0.70  | 8.8%             | 5.9%   | 0.67  |
| * with Kaplan-Meier survival adjustment for censored data |          |        |       |                  |        |       |

## **Acknowledgements**

The Framingham Heart Study (FHS) and Framingham Offspring Study (FOS) are conducted and supported by the National Heart, Lung, and Blood Institute (NHLBI) in collaboration with the FHS and FOS Investigators. This manuscript was prepared using a limited access dataset obtained by the NHLBI and does not necessarily reflect the opinions or views of the FHS, the FOS or the NHLBI.

## References

1. U.S. Census Summary File 1. U.S. Census Bureau, 2000. (Accessed June 28, 2003, at [http://factfinder.census.gov/servlet/DTable?\\_bm=y&-geo\\_id=01000US&-ds\\_name=DEC\\_2000\\_SF1\\_U&-mt\\_name=DEC\\_2000\\_SF1\\_U\\_PCT012.](http://factfinder.census.gov/servlet/DTable?_bm=y&-geo_id=01000US&-ds_name=DEC_2000_SF1_U&-mt_name=DEC_2000_SF1_U_PCT012.))
2. Year 2000 Vital Statistics Mortality Data: Population Death by Cause. 2002. (Accessed June 28th, 2003, at <http://www.cdc.gov/nchs/data/dvs/wktbli.pdf> )
3. National Center for Health Statistics: NVSS Table 307. 'Deaths from 39 Selected Causes by Place of Death, Status of Decedent When Death Occurred in Hospital or Medical Center, and Age: United States' GMWK307 1999. 1999. (Accessed June, 2002, at <http://www.cdc.gov/nchs/datawh/statab/unpubd/mortabs/gmwk307.htm> )
4. Year 2000 Vital Statistics Mortality Data: Death by Selected Causes 2002. (Accessed June 27th, 2003, at [http://www.cdc.gov/nchs/data/statab/mortfinal2000\\_work292.pdf](http://www.cdc.gov/nchs/data/statab/mortfinal2000_work292.pdf) )
5. Grinker JA, Tucker KL, Vokonas PS, Rush D. Changes in patterns of fatness in adult men in relation to serum indices of cardiovascular risk: the Normative Aging Study. *Int J Obes Relat Metab Disord* 2000;24(10):1369-78.
6. de Vreede-Swagemakers JJ, Gorgels AP, Dubois-Arbouw WI, et al. Out-of-hospital cardiac arrest in the 1990's: a population-based study in the Maastricht area on incidence, characteristics and survival. *Journal of the American College of Cardiology* 1997;30(6):1500-5.
7. Kuisma M, Jaara K. Unwitnessed out-of-hospital cardiac arrest: is resuscitation worthwhile? *Annals of emergency medicine* 1997;30(1):69-75.
8. Goraya TY, Jacobsen SJ, Kottke TE, Frye RL, Weston SA, Roger VL. Coronary heart disease death and sudden cardiac death: a 20-year population-based study. *American journal of epidemiology* 2003;157(9):763-70.
9. Albert CM, Chae CU, Grodstein F, et al. Prospective study of sudden cardiac death among women in the United States. *Circulation* 2003;107(16):2096-101.
10. Westfall JM, McGloin J. Impact of double counting and transfer bias on estimated rates and outcomes of acute myocardial infarction. *Medical care* 2001;39(5):459-68.
11. Petersen LA, Wright S, Normand SL, Daley J. Positive predictive value of the diagnosis of acute myocardial infarction in an administrative database. *J Gen Intern Med* 1999;14(9):555-8.
12. Vaccarino V, Krumholz HM, Yarzebski J, Gore JM, Goldberg RJ. Sex differences in 2-year mortality after hospital discharge for myocardial infarction. *Annals of internal medicine* 2001;134(3):173-81.
13. Choudhury L, Marsh JD. Myocardial infarction in young patients. *The American journal of medicine* 1999;107(3):254-61.
14. California Patient Discharge Data January 1 - December 31 2000, Public Version A-24. In. Sacramento, CA: California Office of Statewide Health Planning and Development. Healthcare Quality and Analysis Division.
15. Rieves D, Wright G, Gupta G, Shacter E. Clinical trial (GUSTO-1 and INJECT) evidence of earlier death for men than women after acute myocardial infarction. *The American journal of cardiology* 2000;85(2):147-53.
16. Lagerqvist B, Husted S, Kontny F, et al. A long-term perspective on the protective effects of an early invasive strategy in unstable coronary artery disease: two-year follow-up of the FRISC-II invasive study. *Journal of the American College of Cardiology* 2002;40(11):1902-14.

17. Zijlstra F, Hoorntje JC, de Boer MJ, et al. Long-term benefit of primary angioplasty as compared with thrombolytic therapy for acute myocardial infarction. *The New England journal of medicine* 1999;341(19):1413-9.
18. Framingham Heart Study CD-ROM. In: Department of Health and Human Services; 2005.
19. Coady S. Personal Communication. In: Pamela Coxson P, Department of Medicine, University of California, San Francisco, ed. San Francisco, CA; 2006.
20. Baigent C, Keech A, Kearney PM, et al. Efficacy and safety of cholesterol-lowering treatment: prospective meta-analysis of data from 90,056 participants in 14 randomised trials of statins. *Lancet* 2005;366(9493):1267-78.
21. Roger VL, Jacobsen SJ, Weston SA, et al. Trends in the incidence and survival of patients with hospitalized myocardial infarction, Olmsted County, Minnesota, 1979 to 1994. *Annals of internal medicine* 2002;136(5):341-8.
22. Colditz GA, Willett WC, Rotnitzky A, Manson JE. Weight gain as a risk factor for clinical diabetes mellitus in women. *Annals of internal medicine* 1995;122(7):481-6.
23. Koh-Banerjee P, Wang Y, Hu FB, Spiegelman D, Willett WC, Rimm EB. Changes in body weight and body fat distribution as risk factors for clinical diabetes in US men. *American journal of epidemiology* 2004;159(12):1150-9.
24. Freedman DS, Khan LK, Serdula MK, Dietz WH, Srinivasan SR, Berenson GS. The relation of childhood BMI to adult adiposity: the Bogalusa Heart Study. *Pediatrics* 2005;115(1):22-7.
25. Ogden CL, Flegal KM, Carroll MD, Johnson CL. Prevalence and trends in overweight among US children and adolescents, 1999-2000. *Jama* 2002;288(14):1728-32.
26. Wilsgaard T, Arnesen E. Change in serum lipids and body mass index by age, sex, and smoking status: the Tromso study 1986-1995. *Annals of epidemiology* 2004;14(4):265-73.
27. Wilsgaard T, Schirmer H, Arnesen E. Impact of body weight on blood pressure with a focus on sex differences: the Tromso Study, 1986-1995. *Arch Intern Med* 2000;160(18):2847-53.
28. Flegal KM, Graubard BI, Williamson DF, Gail MH. Cause-specific excess deaths associated with underweight, overweight, and obesity. *Jama* 2007;298(17):2028-37.

Filename: Appendix temp double spaced 112807 final.doc  
Directory: C:\Documents and Settings\mprince\Local  
Settings\Temporary Internet Files\OLK3A93  
Template: C:\Documents and Settings\mprince\Application  
Data\Microsoft\Templates\Normal.dot  
Title: Appendix: The CHD Policy Model  
Subject:  
Author: Pamela Coxson  
Keywords:  
Comments:  
Creation Date: 11/28/2007 6:30:00 AM  
Change Number: 2  
Last Saved On: 11/28/2007 6:30:00 AM  
Last Saved By: kdomingo  
Total Editing Time: 3 Minutes  
Last Printed On: 11/28/2007 9:45:00 AM  
As of Last Complete Printing  
Number of Pages: 15  
Number of Words: 10,914 (approx.)  
Number of Characters: 62,215 (approx.)
